# Supplementary material
Source: PubMed Central journal article supplement (PMC3839703)

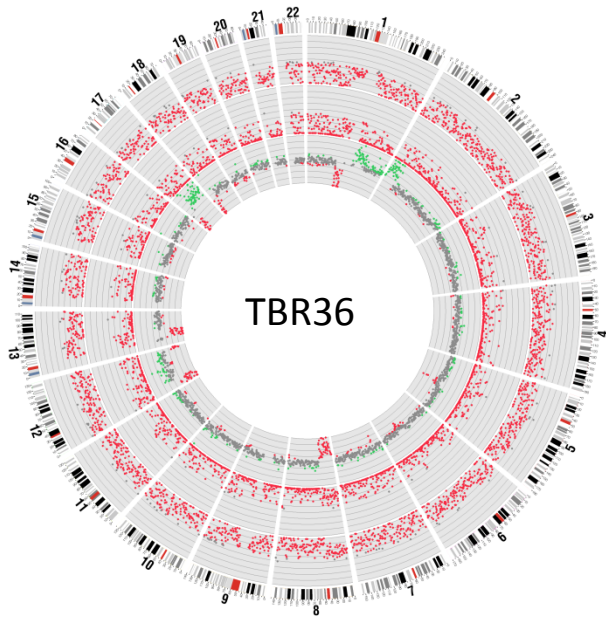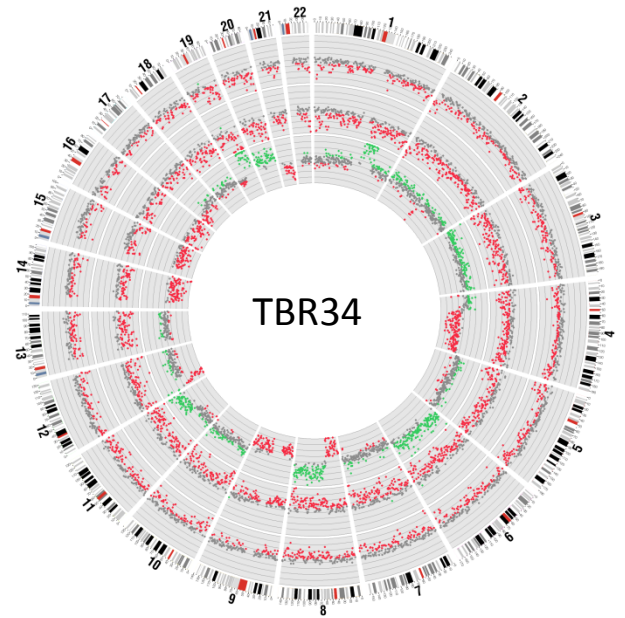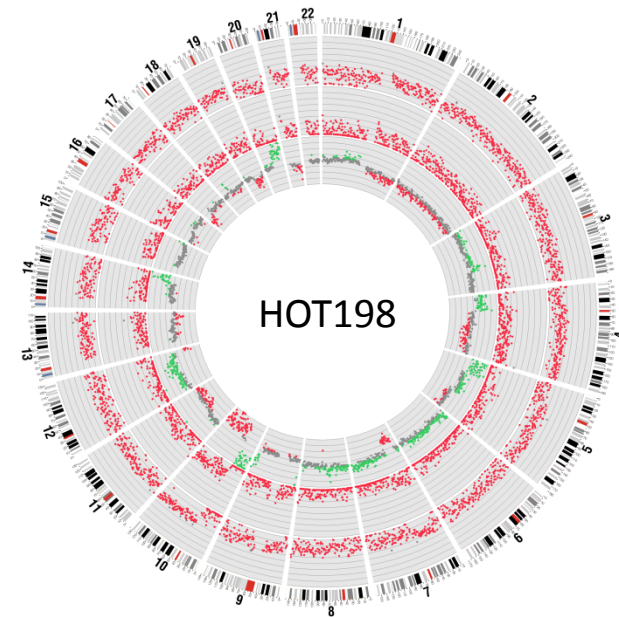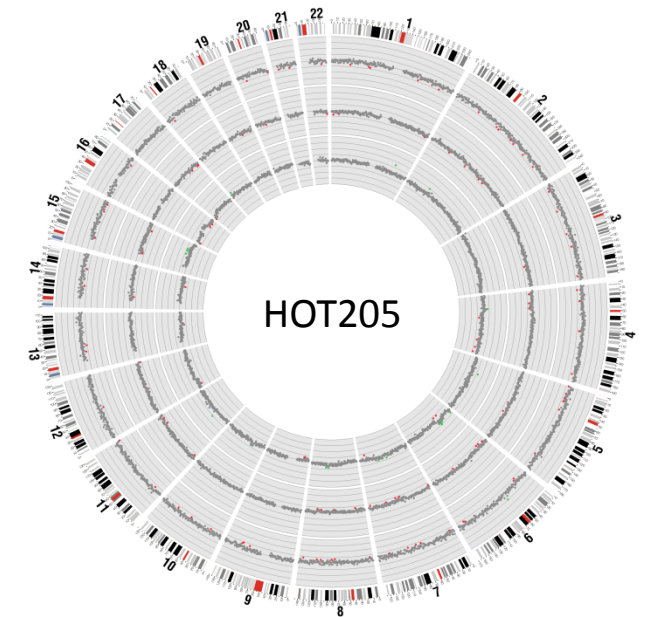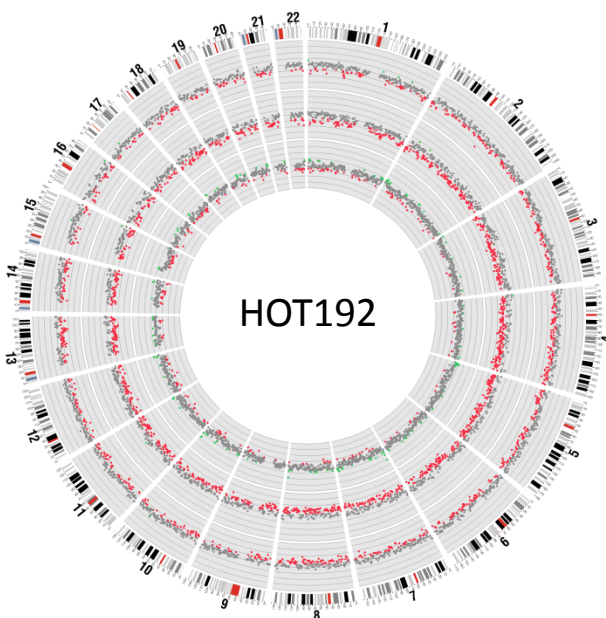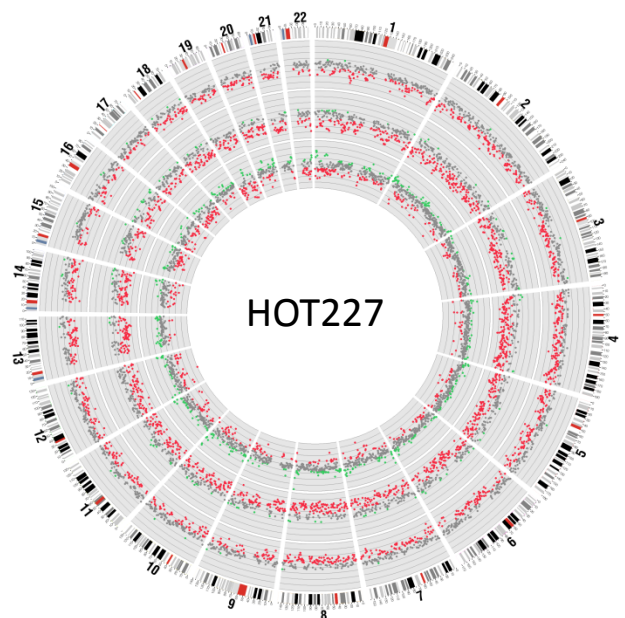

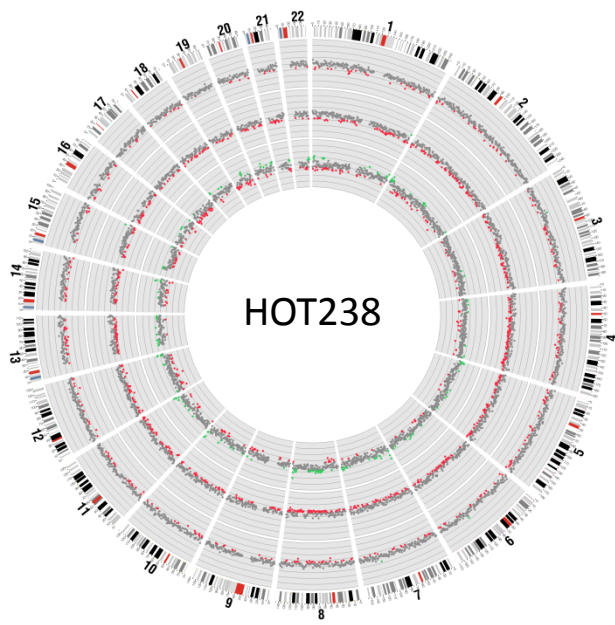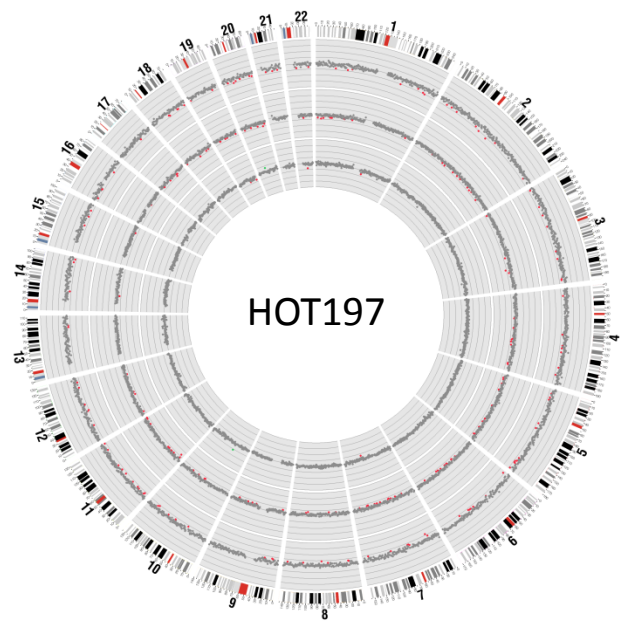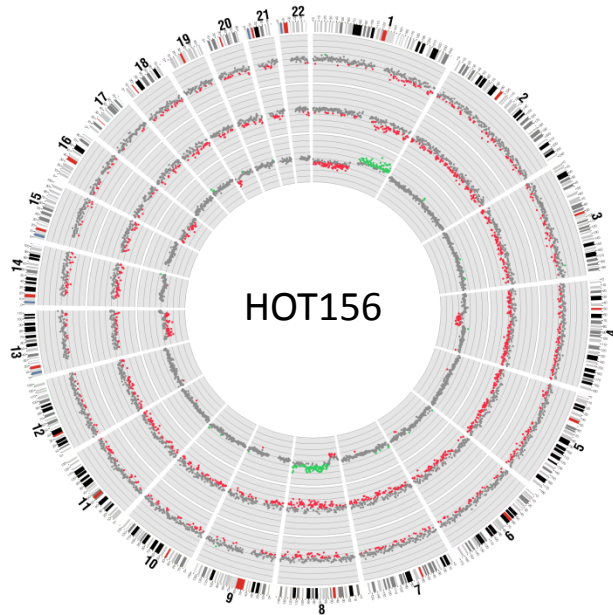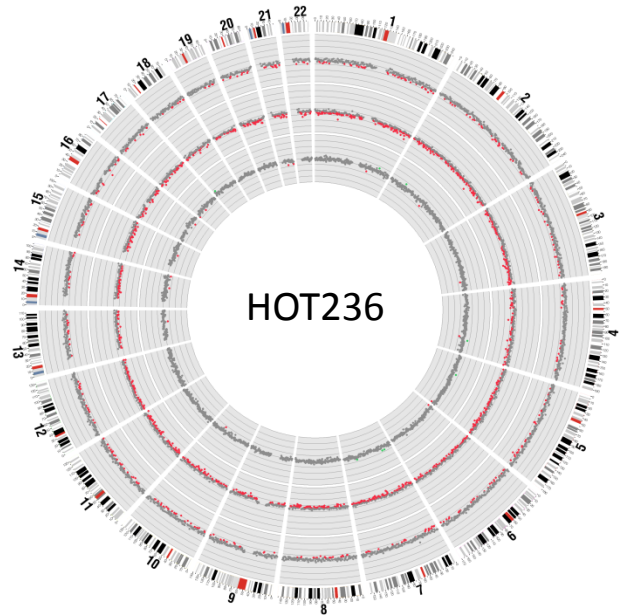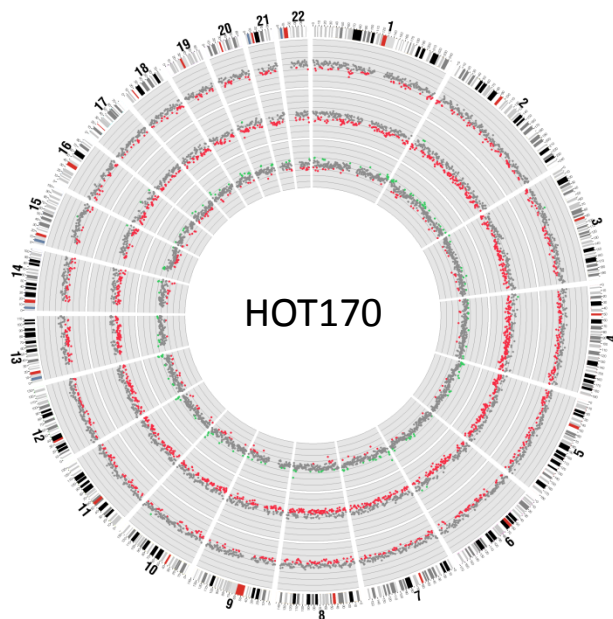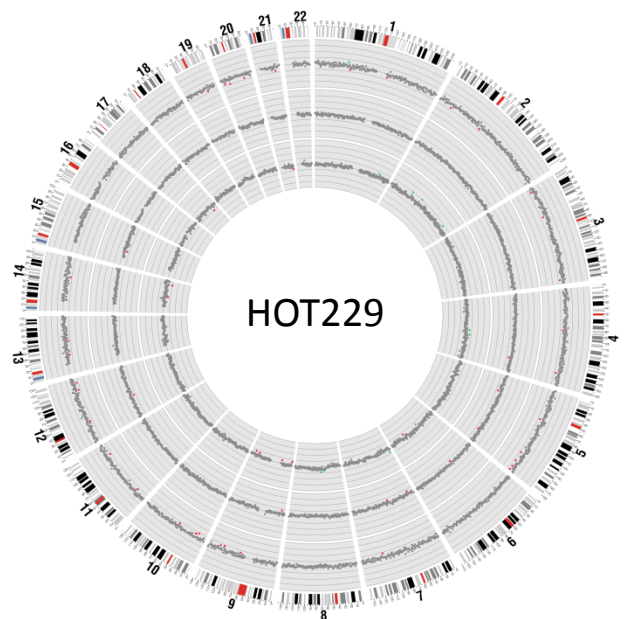



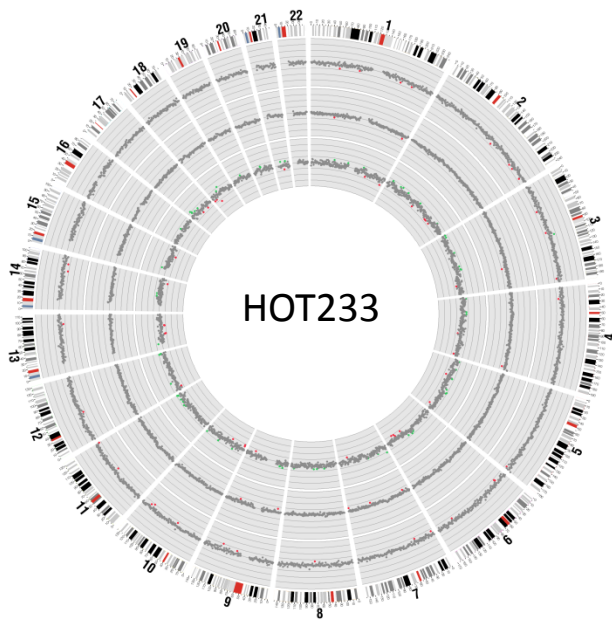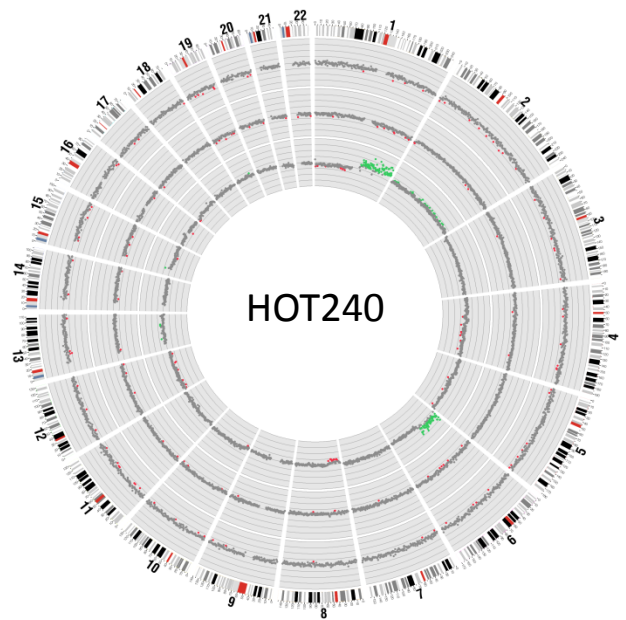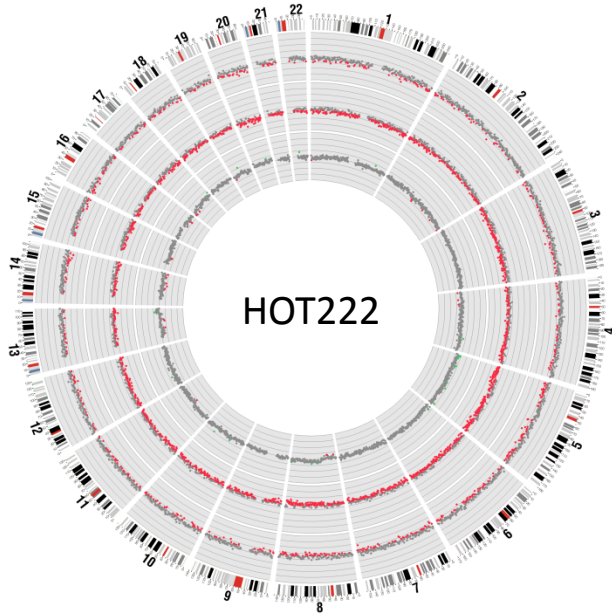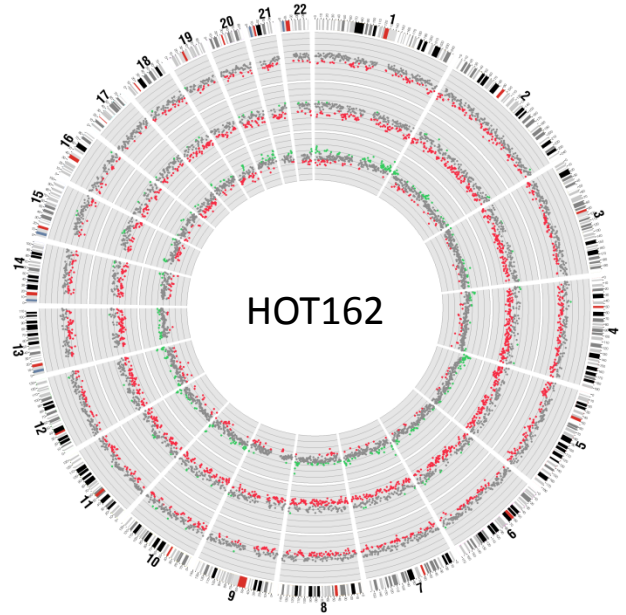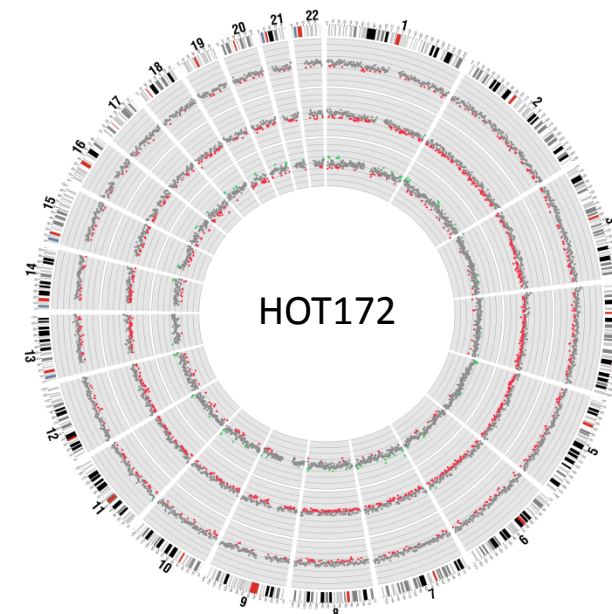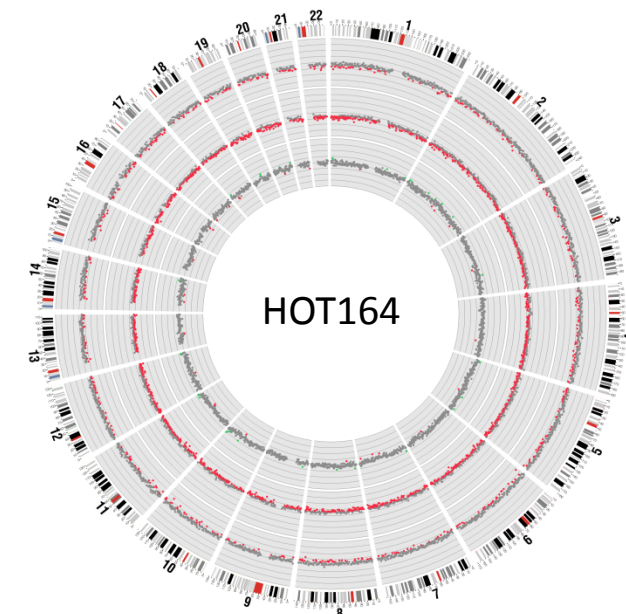

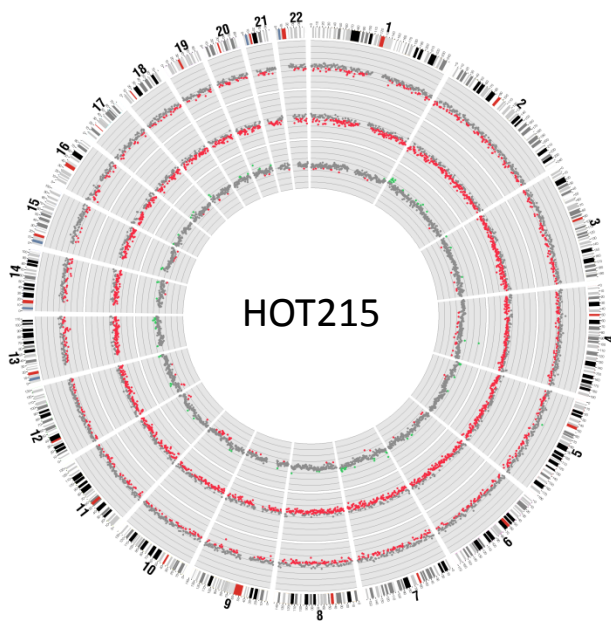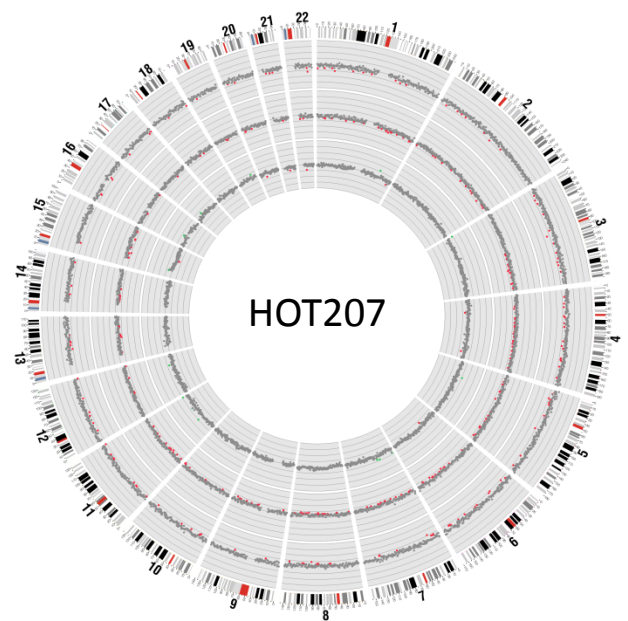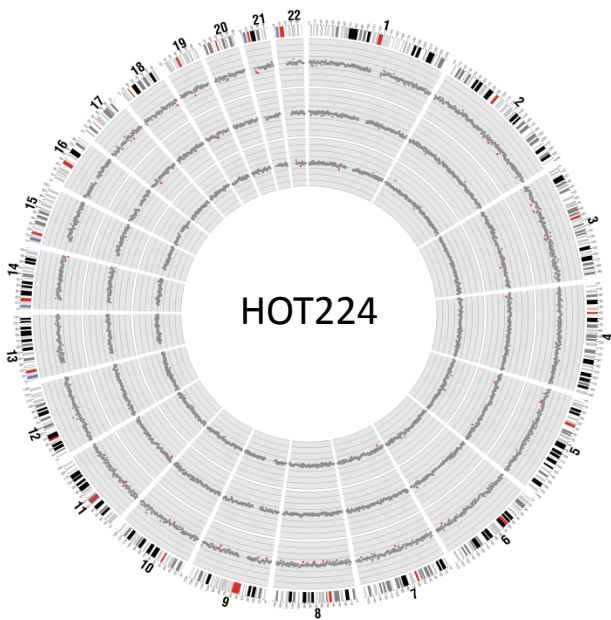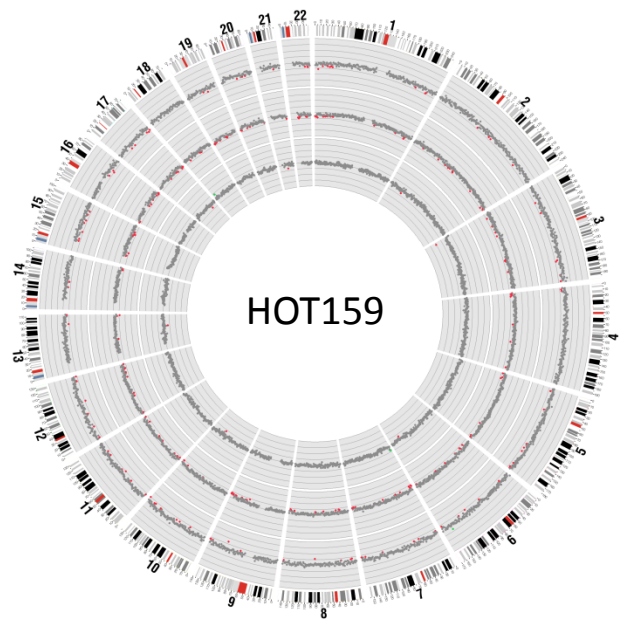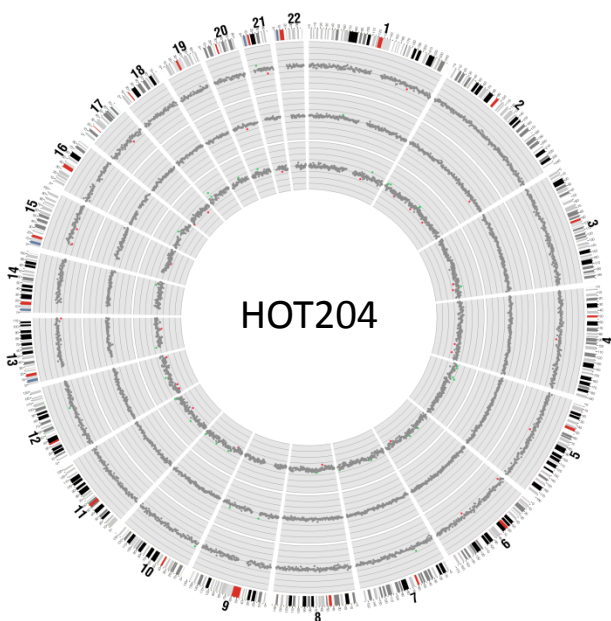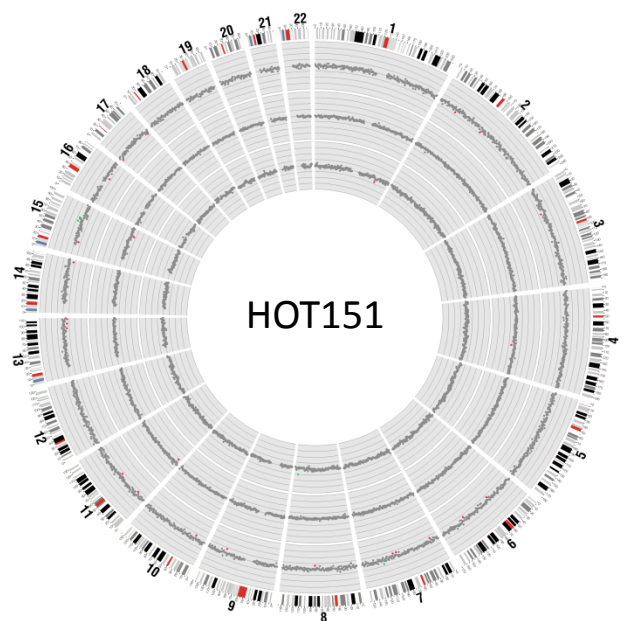



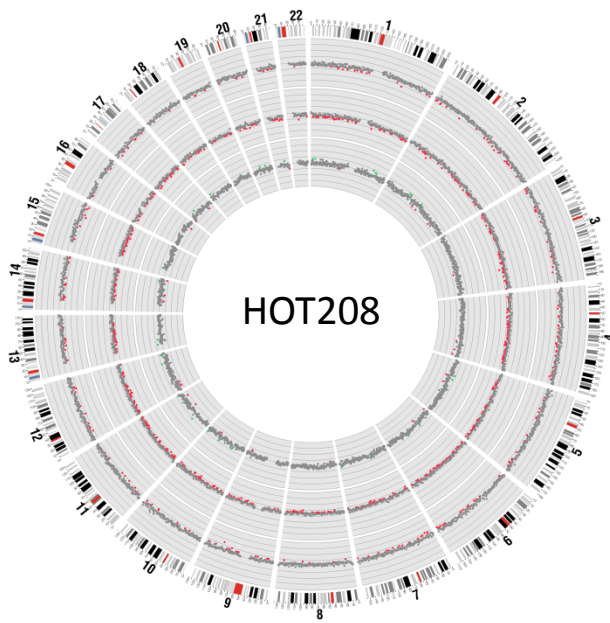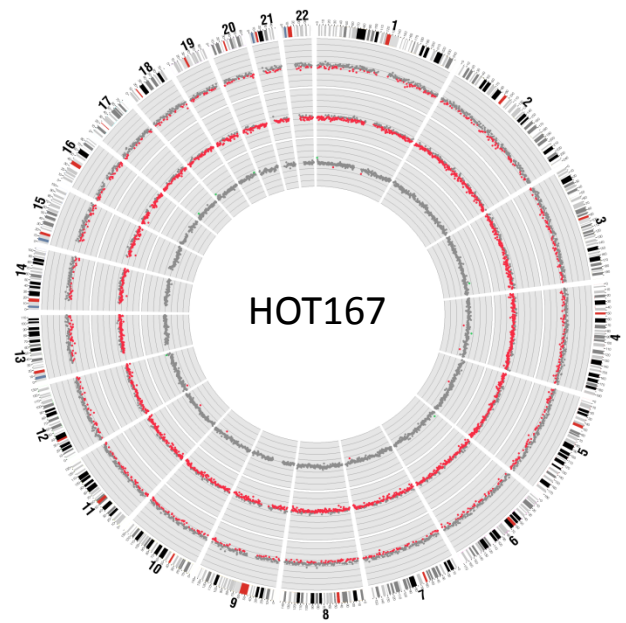

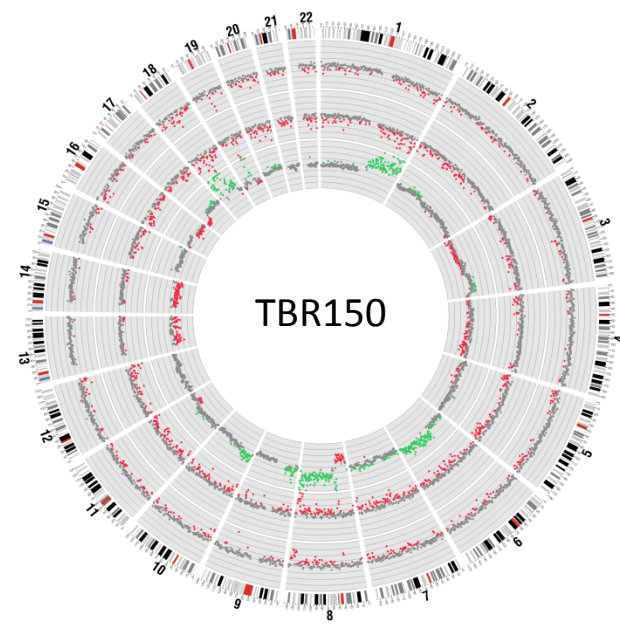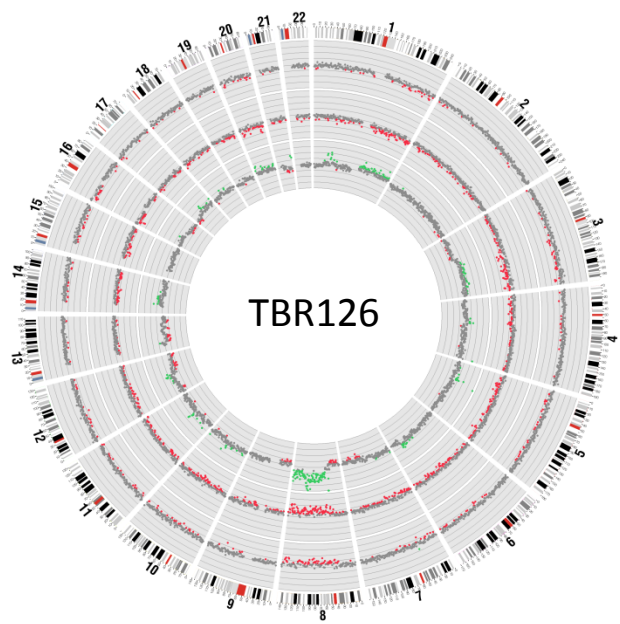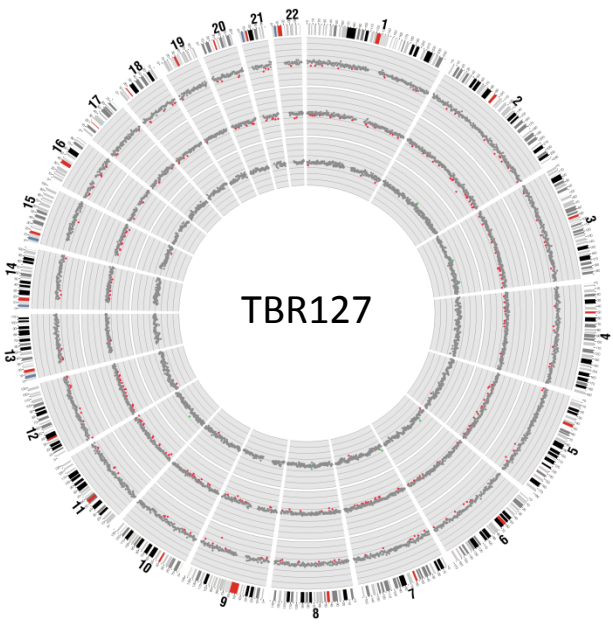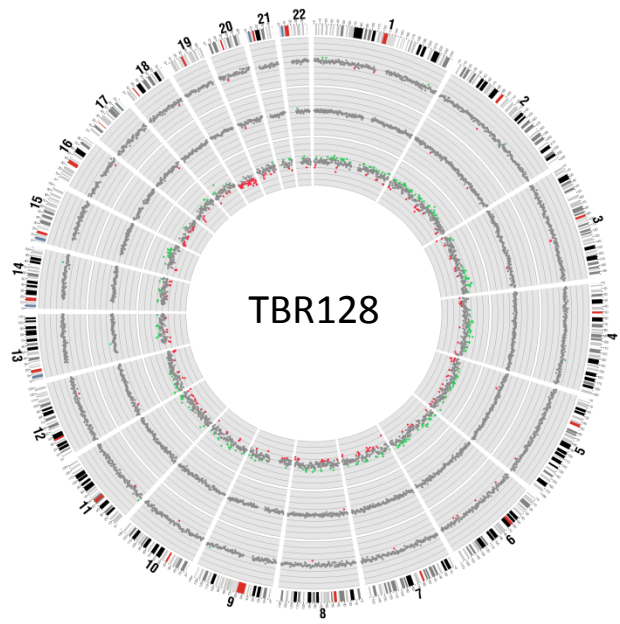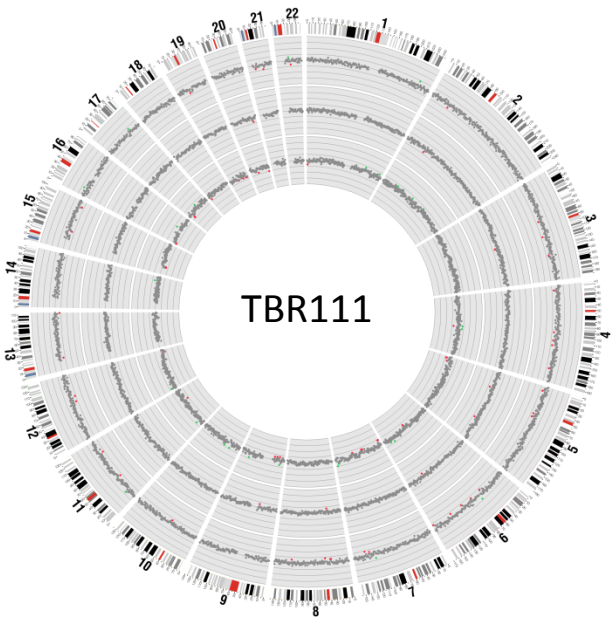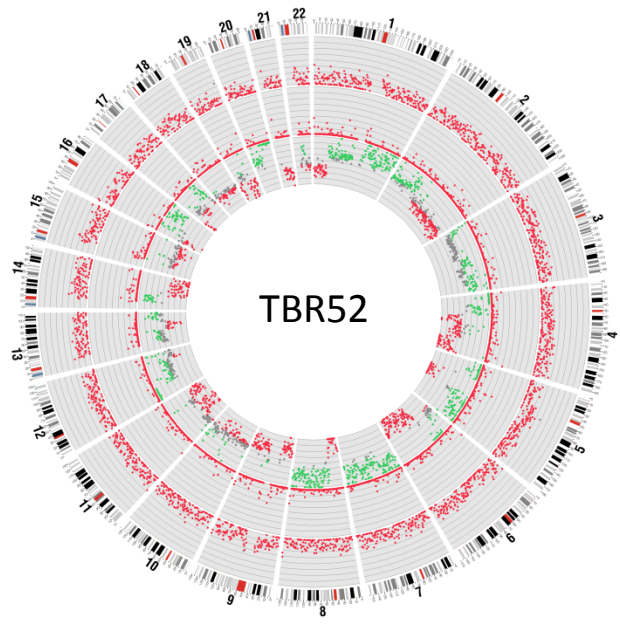



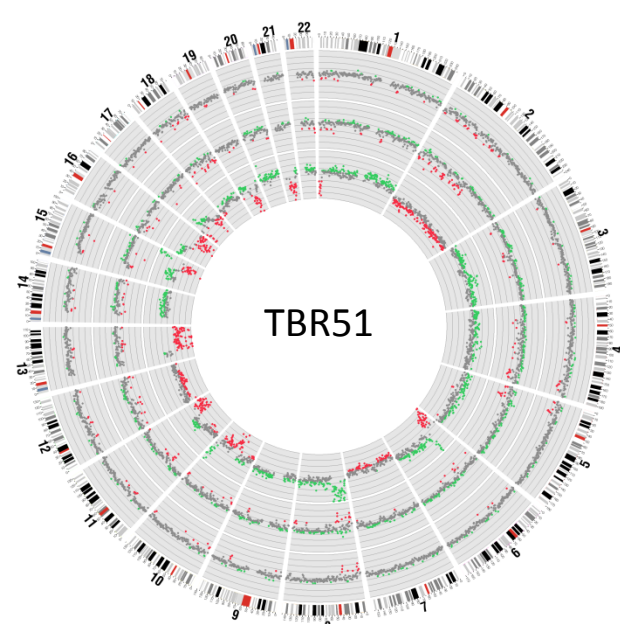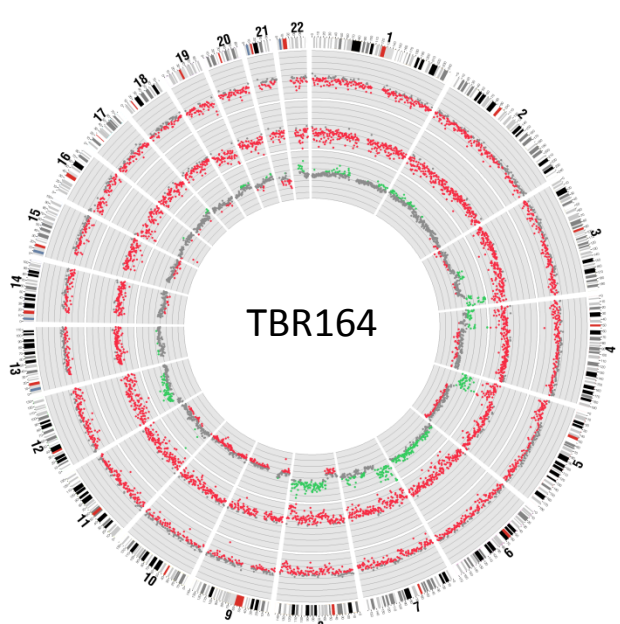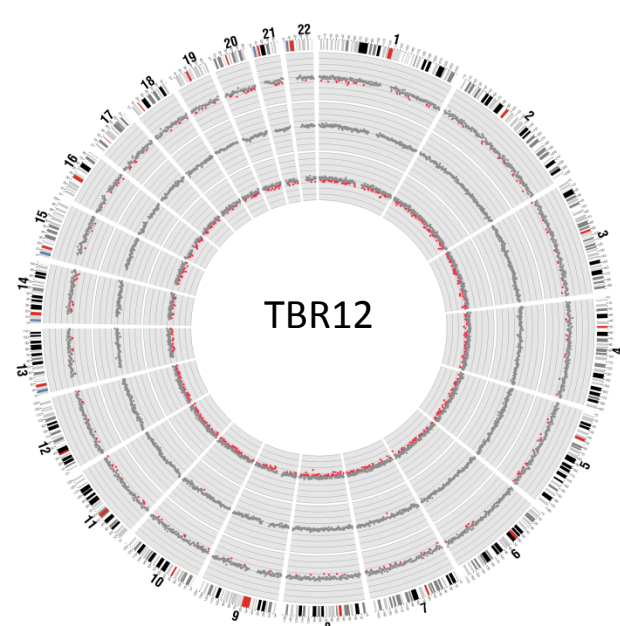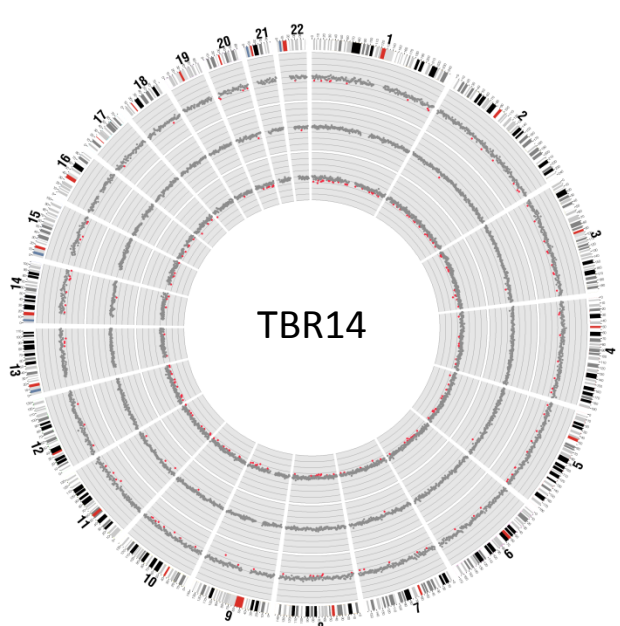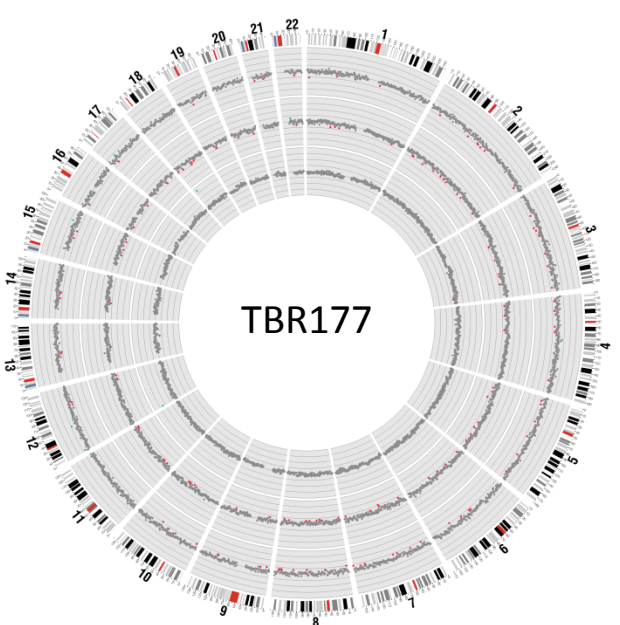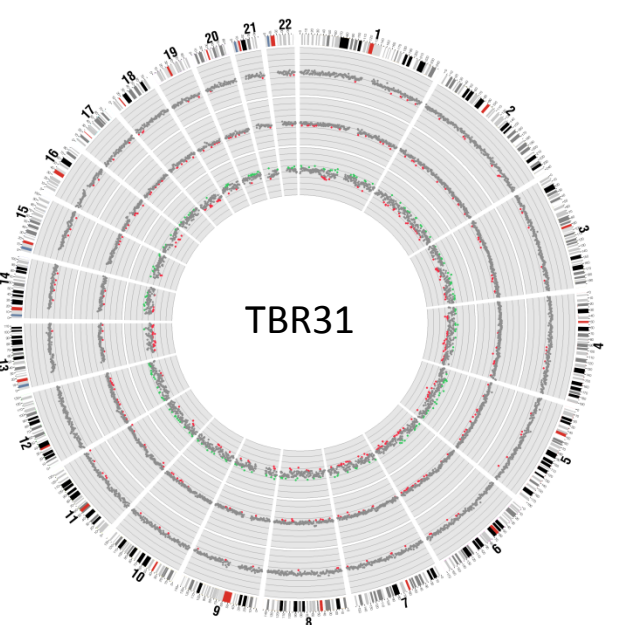

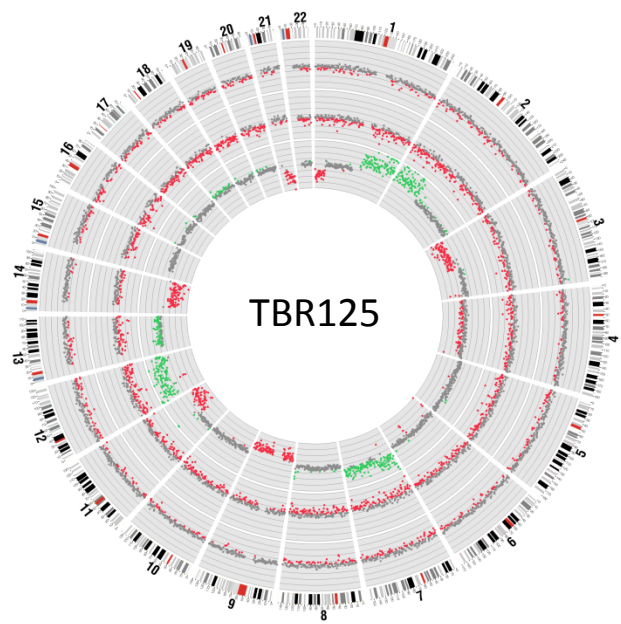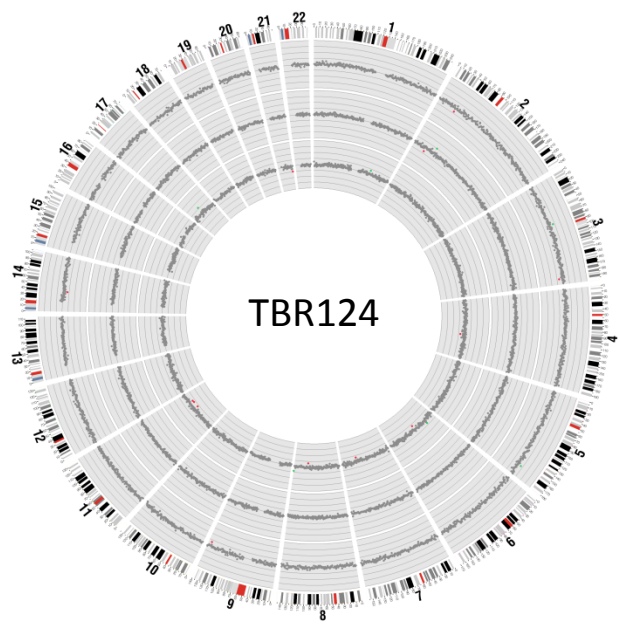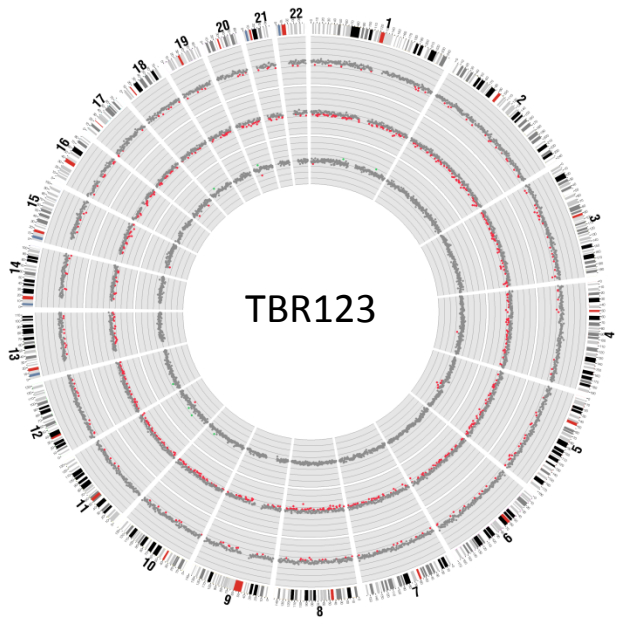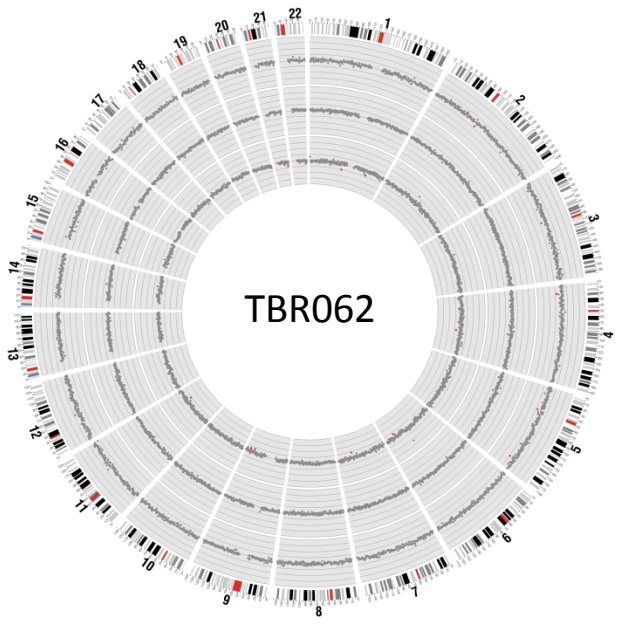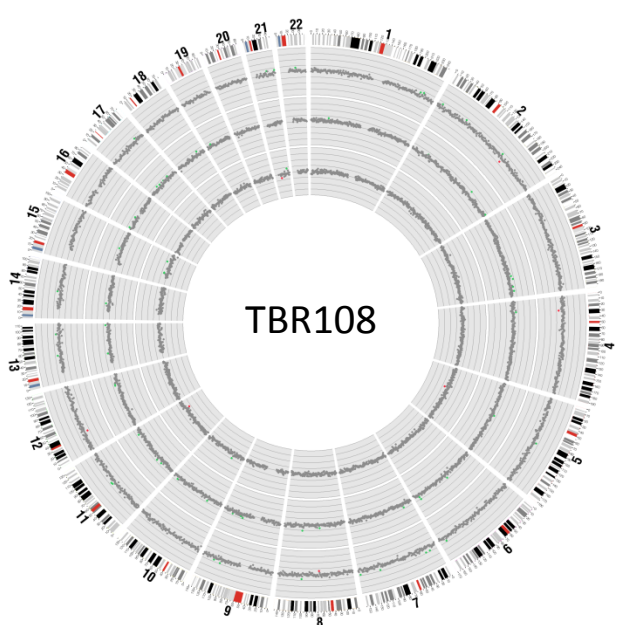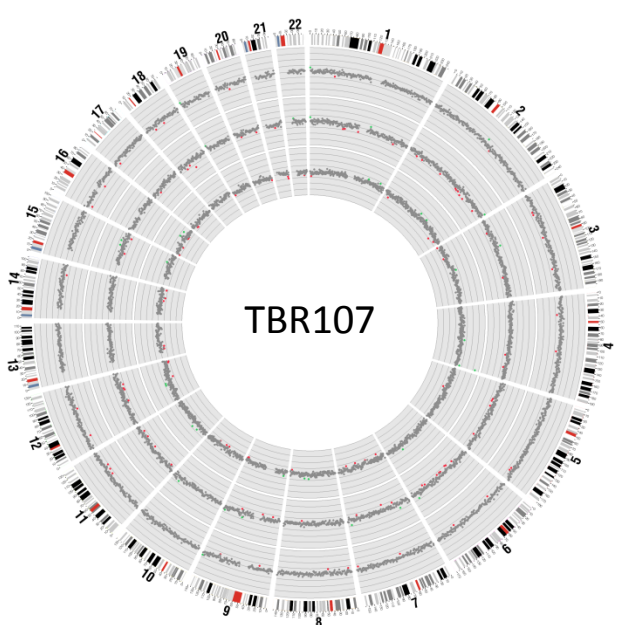



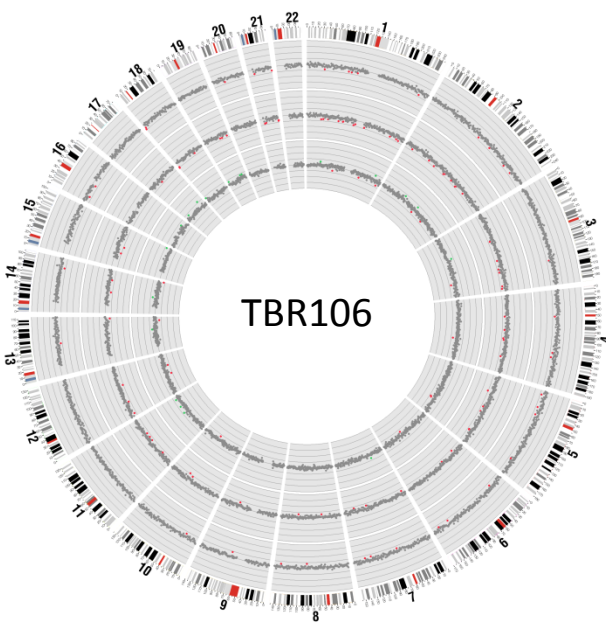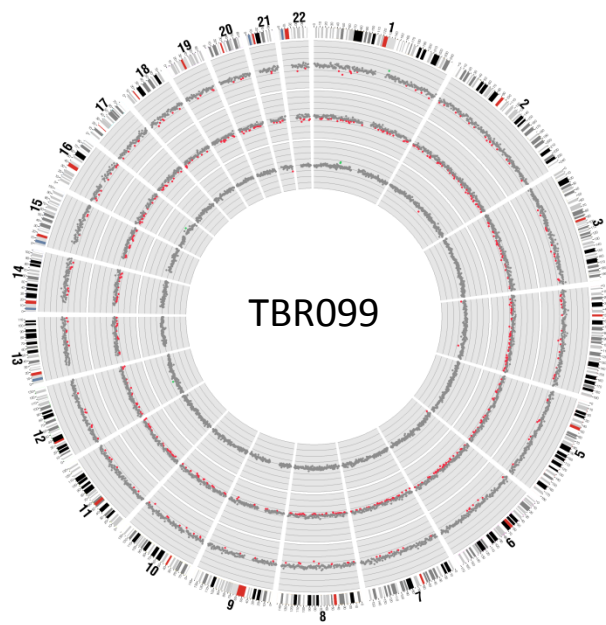

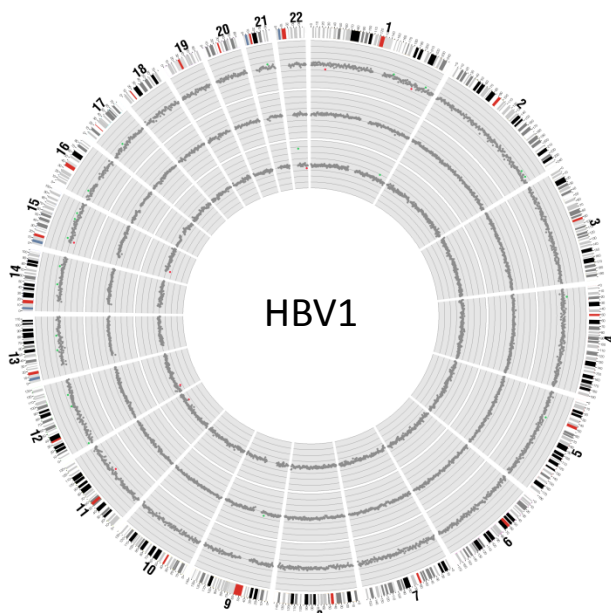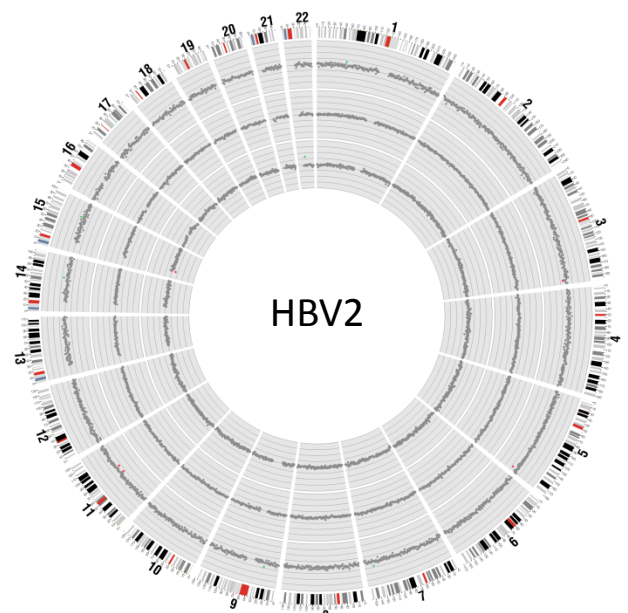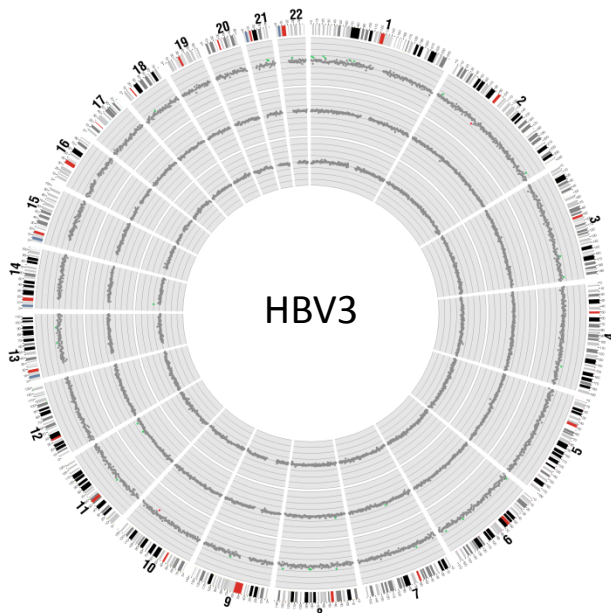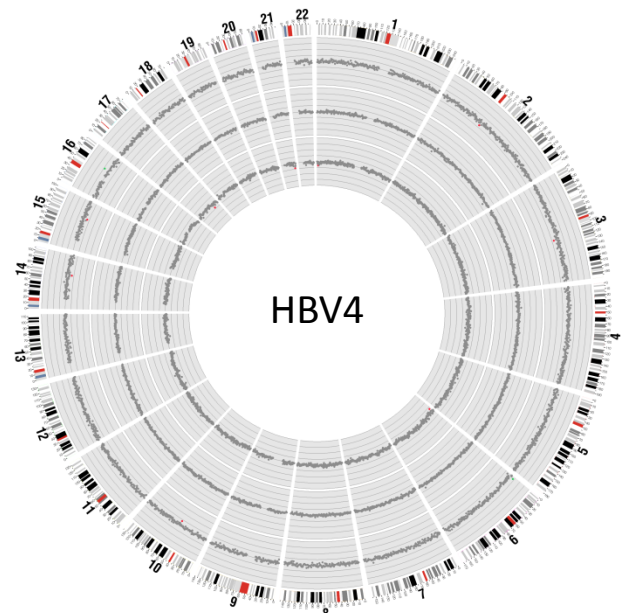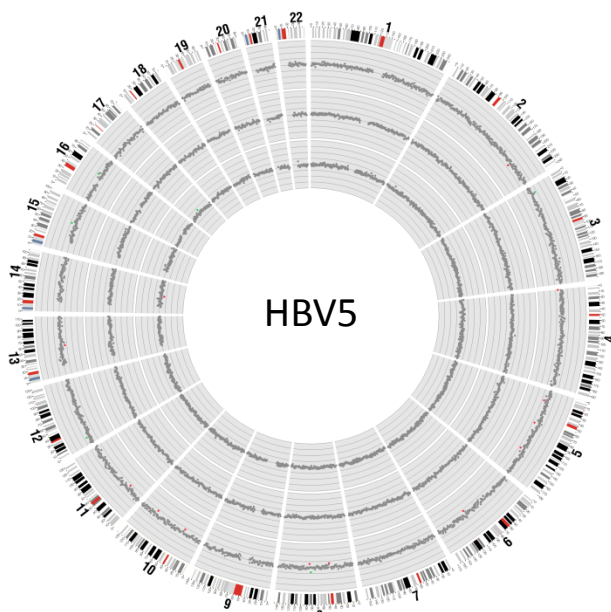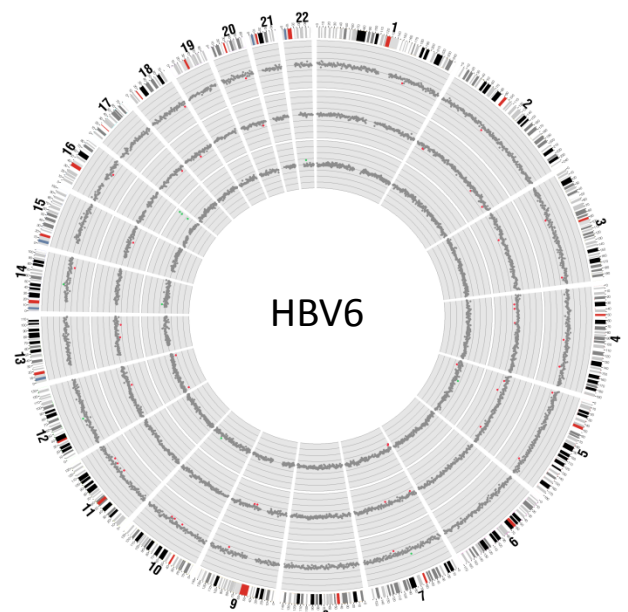



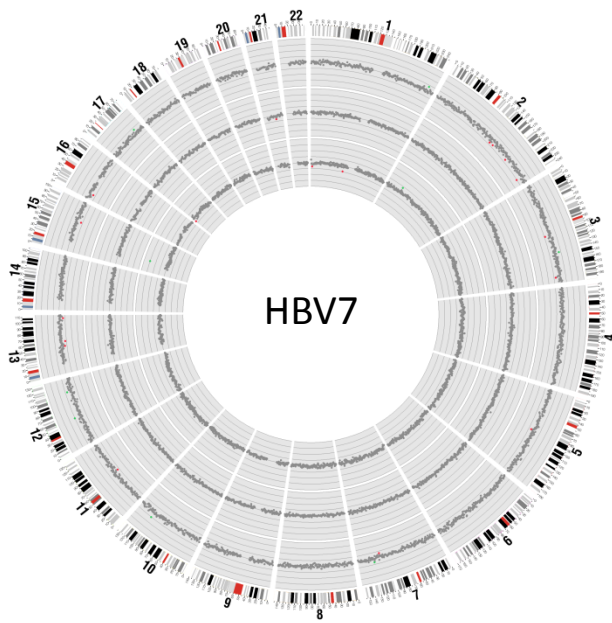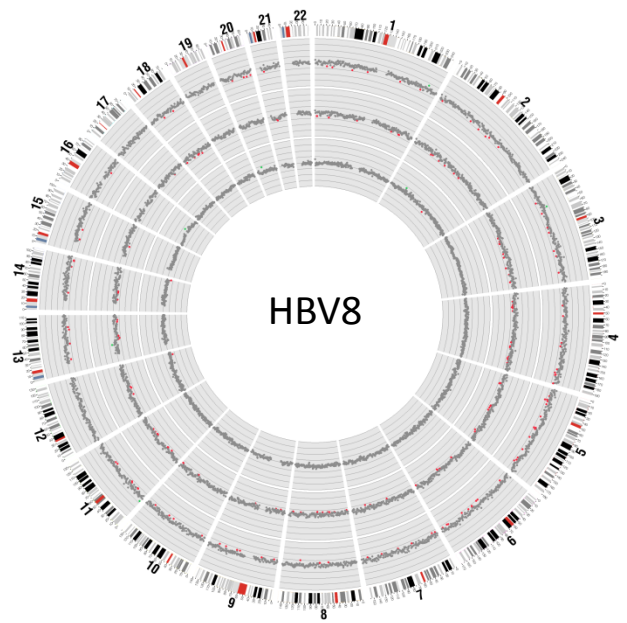

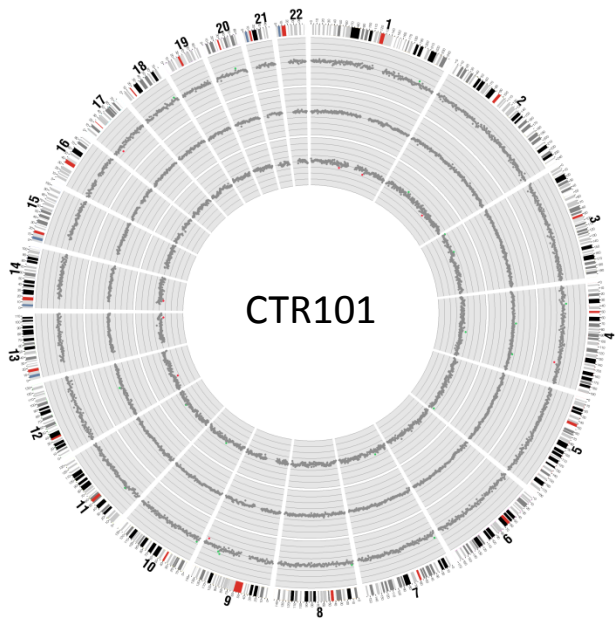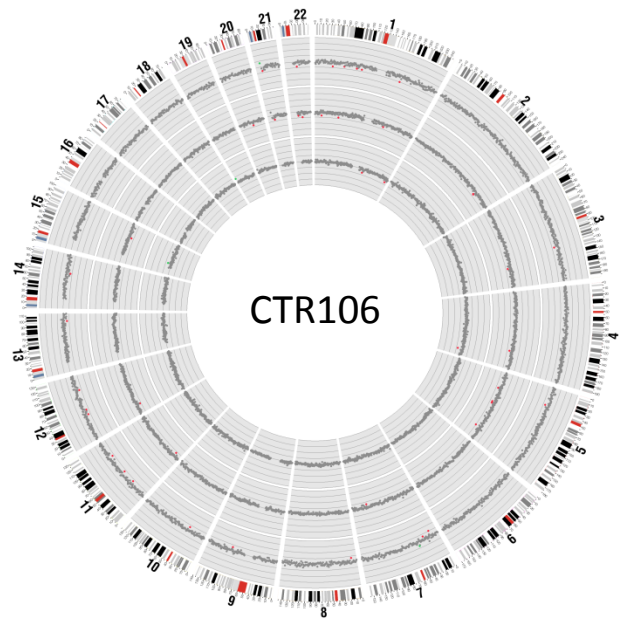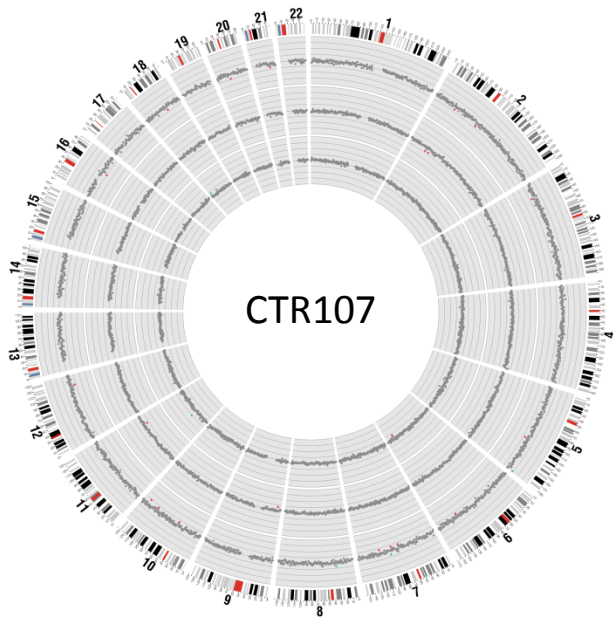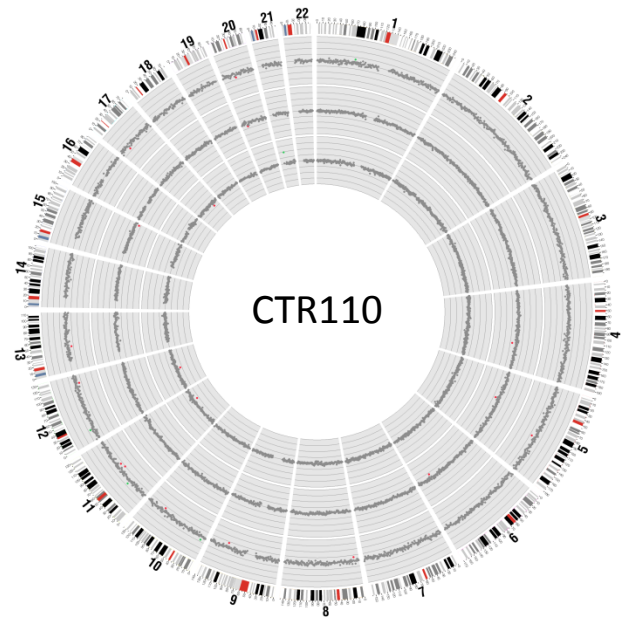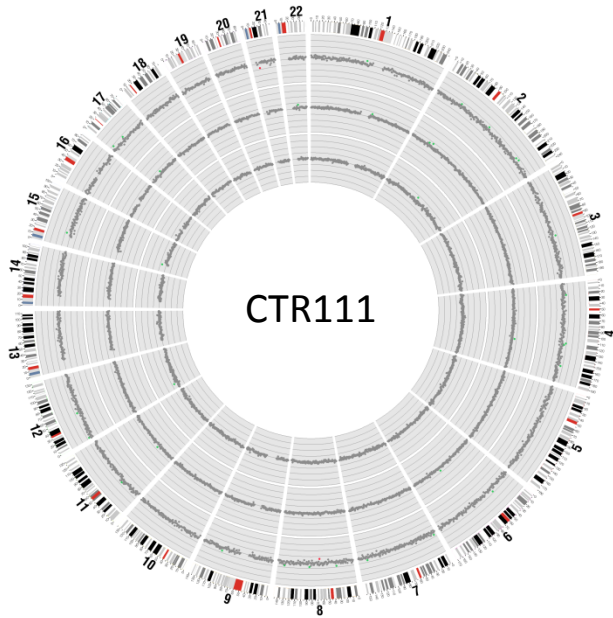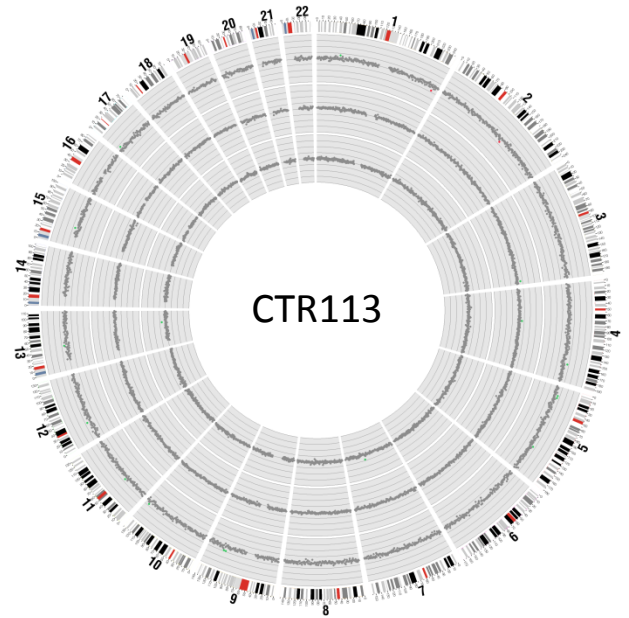



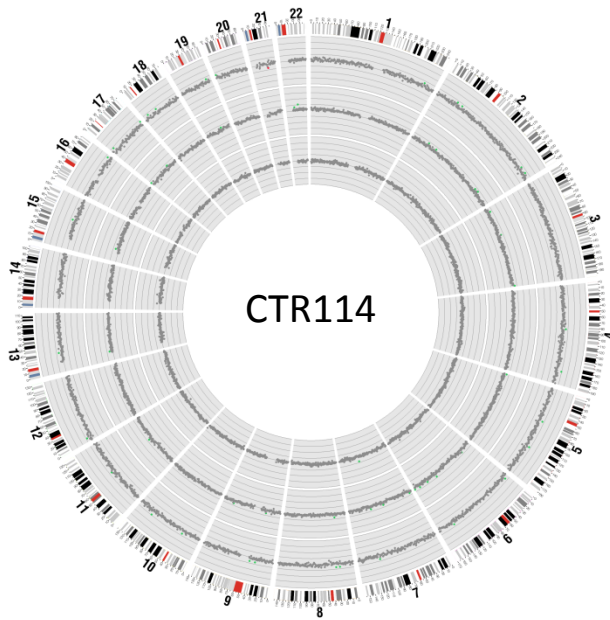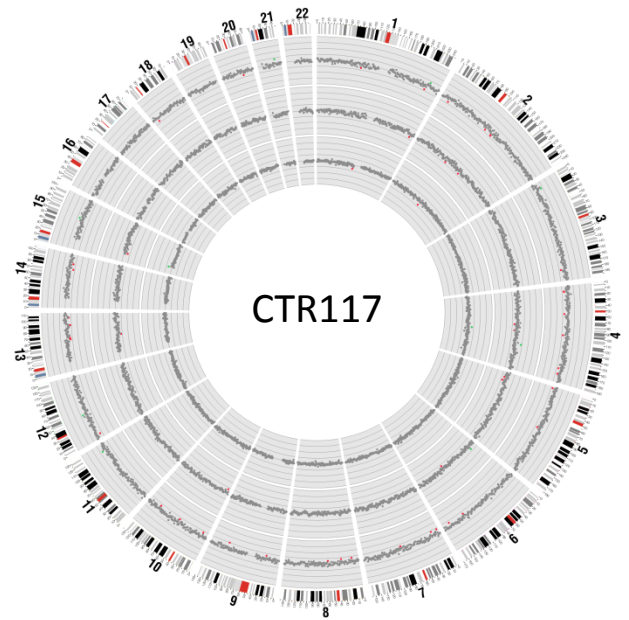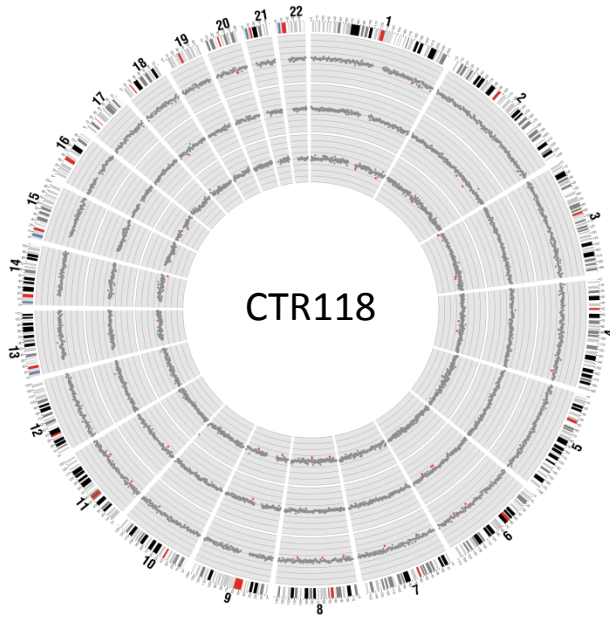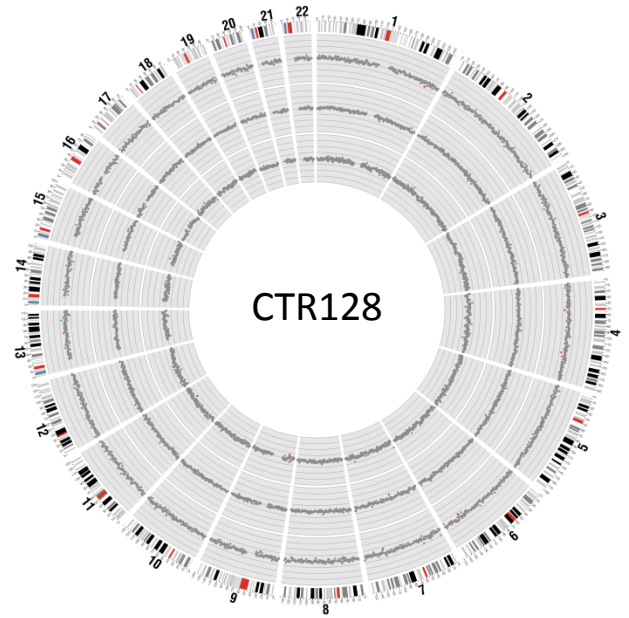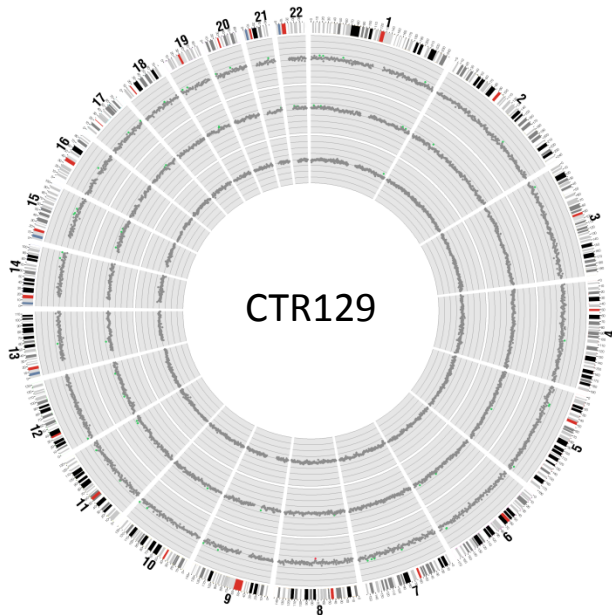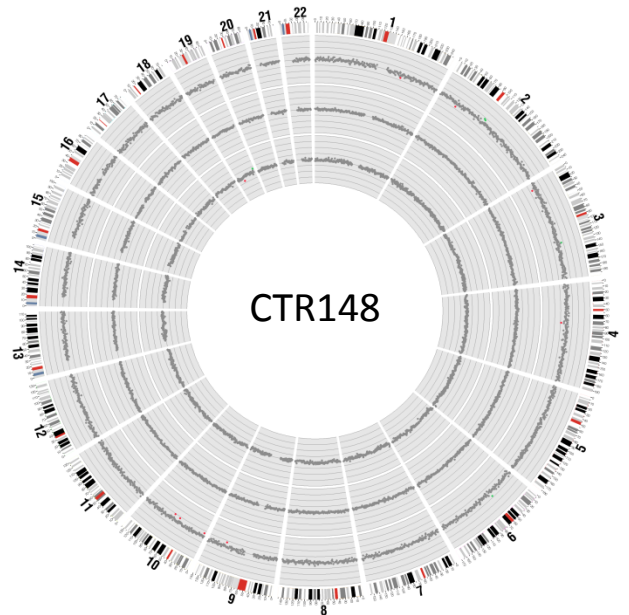

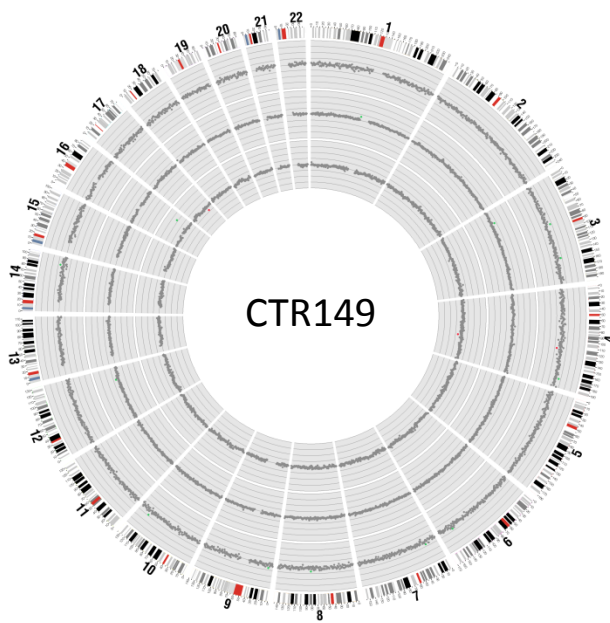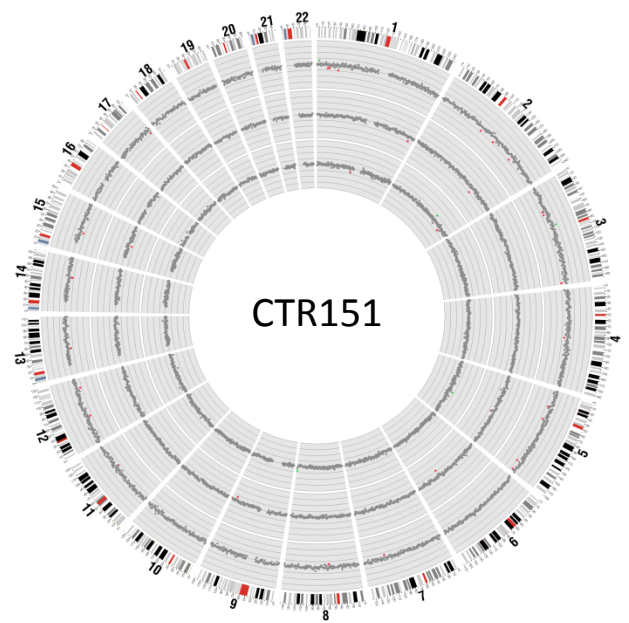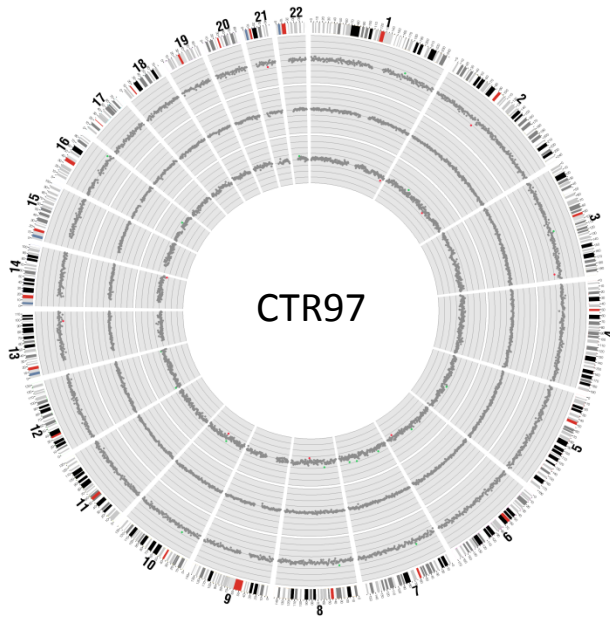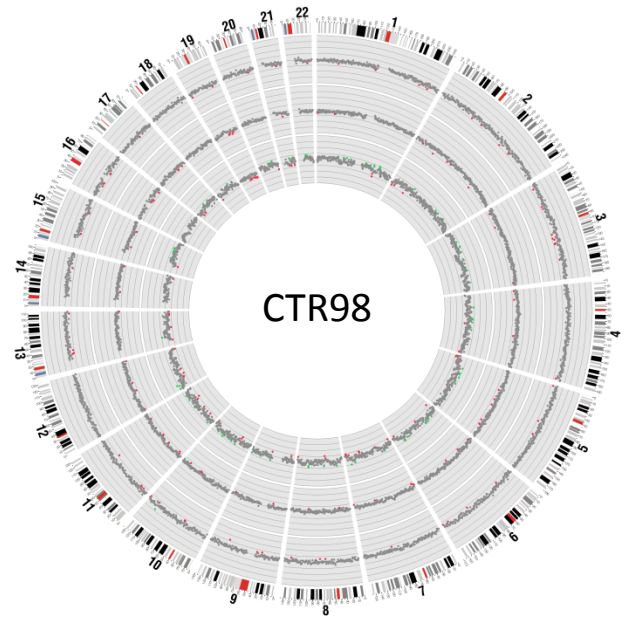

Supplement: 1313995110_sfig01.pdf [file 1313995110_sfig01.pdf]

Fig. S2A

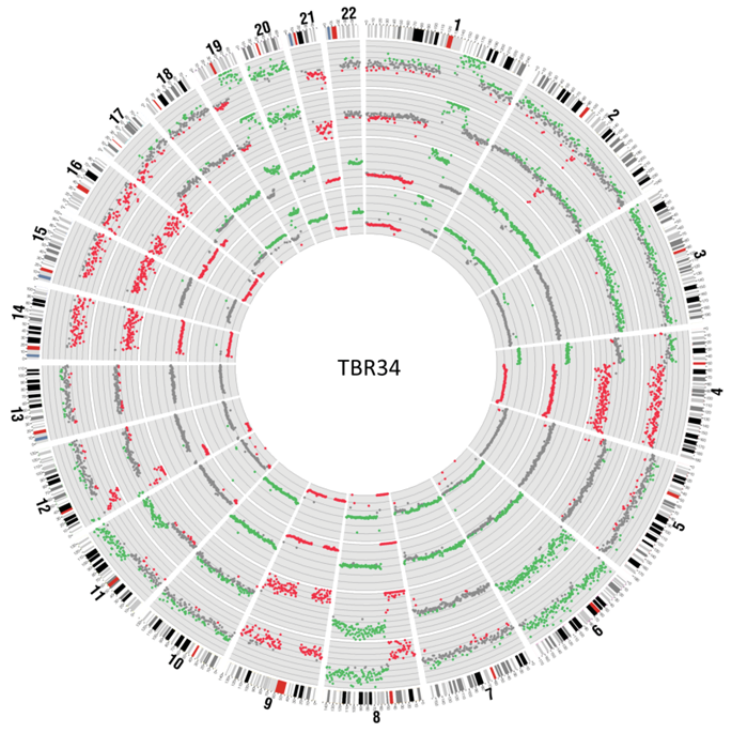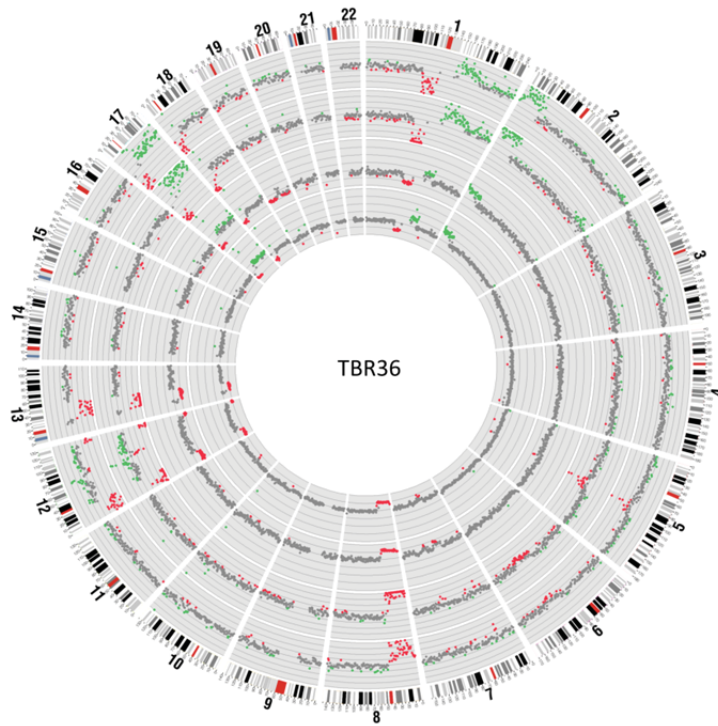

Fig. S2B

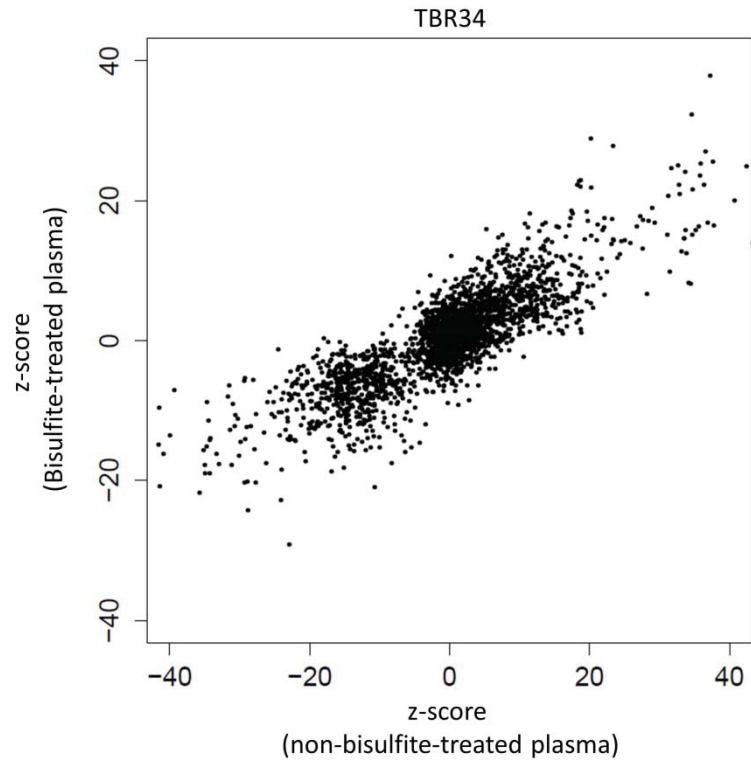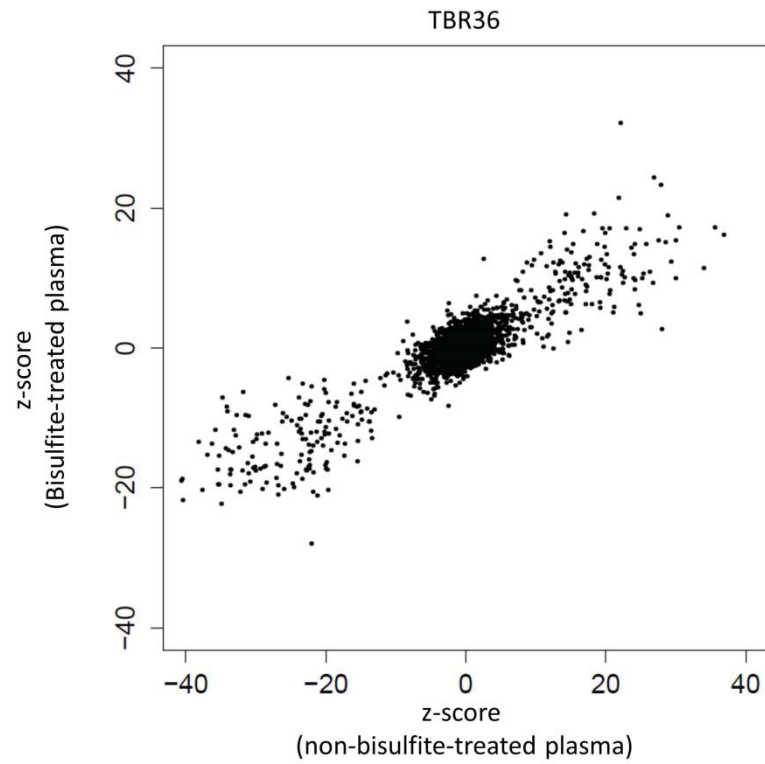

Supplement: 1313995110_sfig02.pdf [file 1313995110_sfig02.pdf]
